# Supplementary material for: Montelukast Induces Apoptosis-Inducing Factor-Mediated Cell Death of Lung Cancer Cells
Source: MDPI journal article supplement (doi:10.3390/ijms18071353), 2017-06-24
Supplement: s1 [file s1]

# Supplementary Material: Montelukast Induces Apoptosis-Inducing Factor-Mediated Cell Death of Lung Cancer Cells

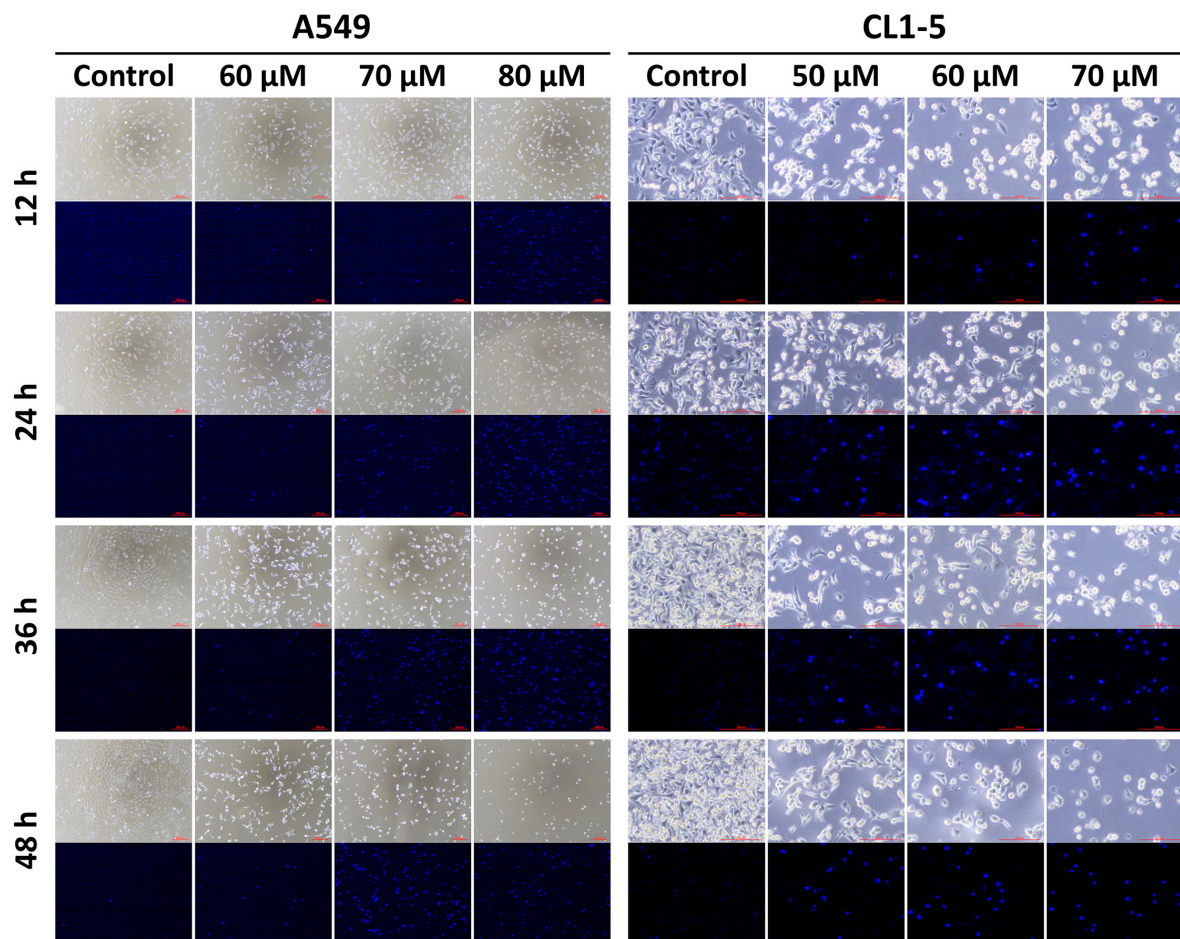

**Figure S1.** Montelukast-induced cell death of lung cancer cells. After being treated with various concentrations of montelukast for the indicated time (12, 24, 36, or 48 h), the cells (A549 and CL1-5) were observed with light microscopy and fluorescence microscopy (DAPI staining).
